# Supplementary material
Source: publisher figshare collection journal article supplement (https://frontiersin.figshare.com/ndownloader/files/14877179)

# Flow diagram for the present study

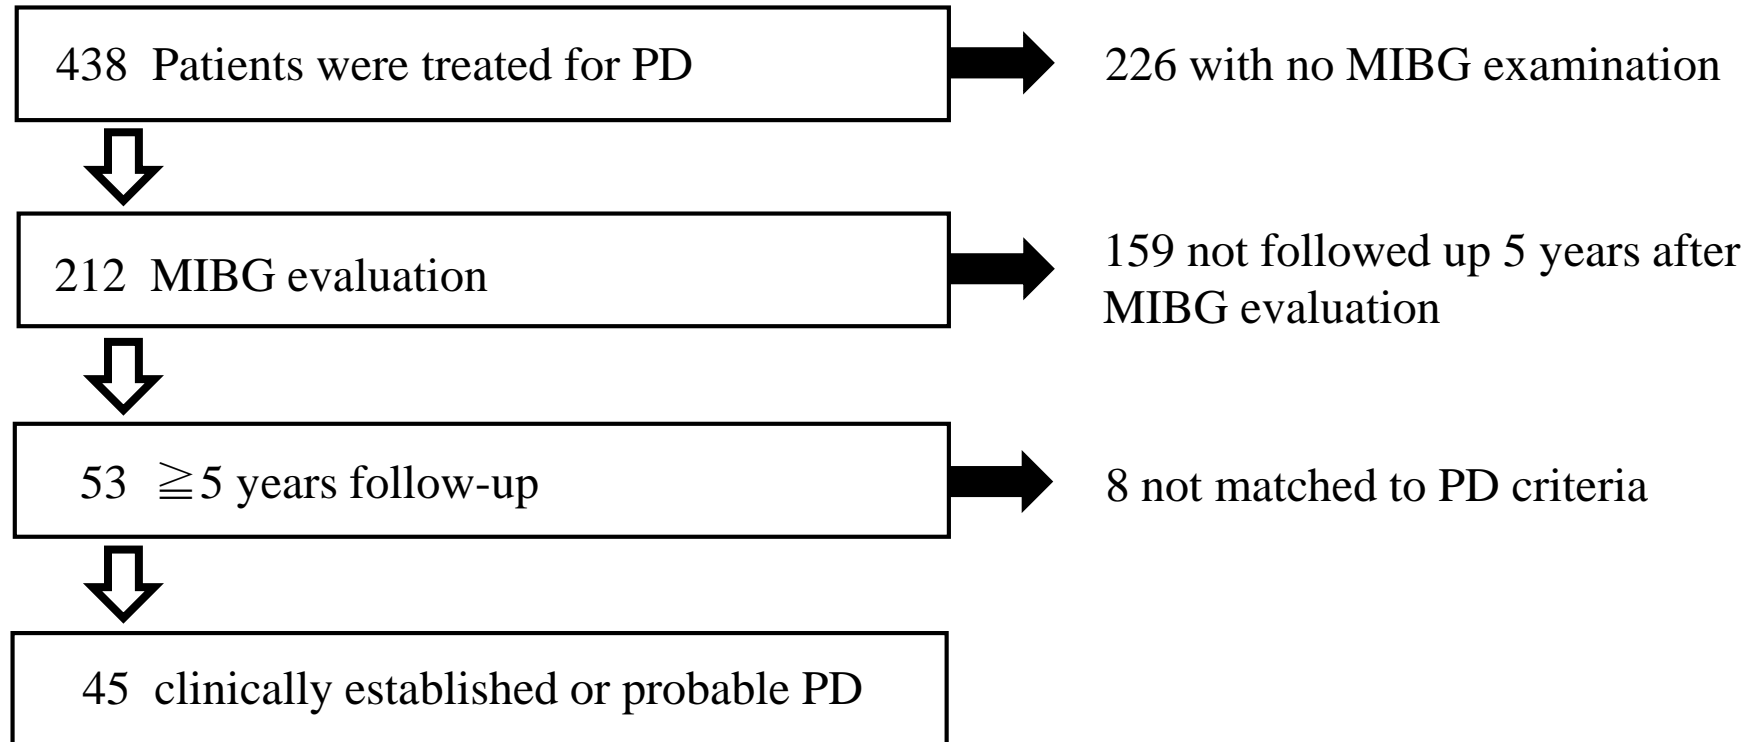

Supplement: Supplementary file [file 14877179]
